# Supplementary material for: Spatially separated bipolar transport and surface electron accumulation in tungsten diselenide nanostructures
Source: Royal Society of Chemistry journal article supplement (doi:10.1039/d5nr03739e), 2026-01-01
Supplement: d5nr03739e1.pdf [file d5nr03739e1.pdf]

## **Supplementary Information**

# **Spatially Separated Bipolar Transport and Surface Electron Accumulation in Tungsten Diselenide Nanostructures**

Hemanth Kumar Bangolla<sup>1</sup>, Chi-Yang Chen<sup>2</sup>, Cheng-Maw Cheng<sup>3,4,5,6</sup>, Kuei-Yi Lee<sup>2</sup>,  
Liang-Chiun Chao<sup>2</sup>, Rajesh Kumar Ulaganathan <sup>7,8</sup>, Raman Sankar<sup>7</sup>, Abhishek Ghosh<sup>9</sup>,  
Ruei-San Chen<sup>1,\*</sup>

<sup>1</sup>Graduate Institute of Applied Science and Technology, National Taiwan University of Science and Technology, Taipei 10607, Taiwan

<sup>2</sup>Graduate Institute of Electro-Optical Engineering, National Taiwan University of Science and Technology, Taipei 10607, Taiwan

<sup>3</sup>National Synchrotron Radiation Research Center, Hsinchu 30076, Taiwan

<sup>4</sup>Department of Physics, National Sun Yat-sen University, Kaohsiung 80424, Taiwan

<sup>5</sup>Department of Electrophysics, National Yang Ming Chiao Tung University, Hsinchu 300, Taiwan.

<sup>6</sup>Taiwan Consortium of Emergent Crystalline Materials, National Science and Technology Council, Taipei 10601, Taiwan.

<sup>7</sup>Institute of Physics, Academia Sinica, Taipei 115201, Taiwan

<sup>8</sup>Centre for Nanotechnology, Indian Institute of Technology Roorkee, 247667, India

<sup>9</sup>Institute of Atomic and Molecular Sciences, Academia Sinica, Taipei 10617, Taiwan

\*E-mail: [rsc@mail.ntust.edu.tw](mailto:rsc@mail.ntust.edu.tw)

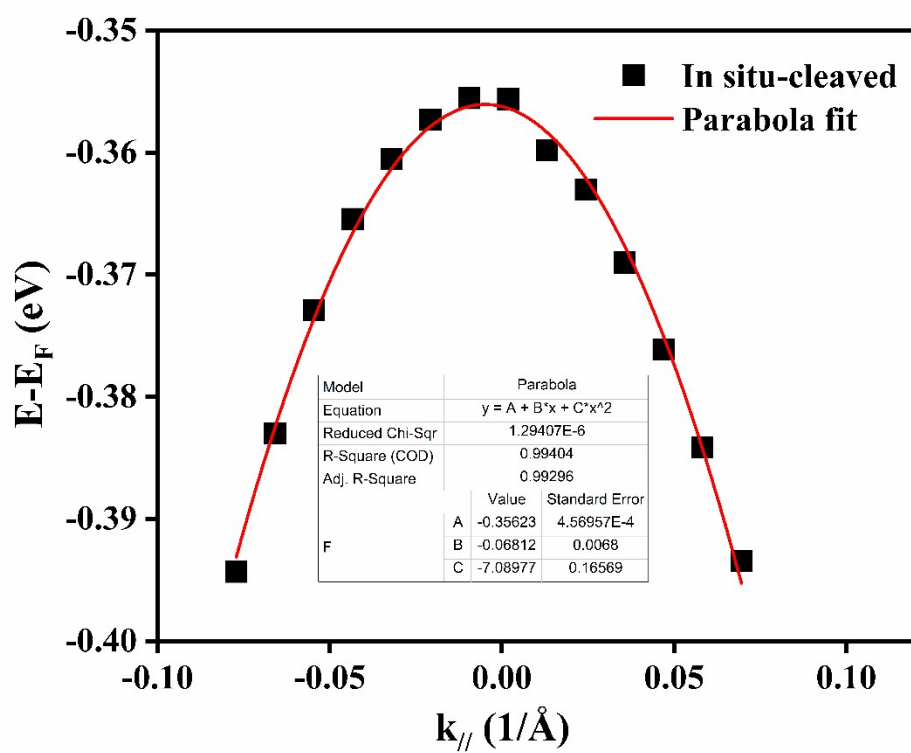

Fig. S1. The Parabolic fitting of VBM for the in situ-cleaved surface of WSe<sub>2</sub>.

**Note S1:** The effective mass evolution across pure, Se-vacant, and O-substituted WSe<sub>2</sub> directly reflects the underlying changes in band dispersion induced by defect chemistry. Pristine WSe<sub>2</sub> exhibits moderately light carriers ( $m_e^* = 0.403 m_0$ ,  $m_h^* = 0.548 m_0$ ), consistent with the well-dispersed bands arising from strong W–Se hybridization at the K valley. Introducing a Se vacancy disrupts this bonding environment and generates localized defect states that flatten both the conduction- and valence-band edges, leading to substantially heavier effective masses ( $m_e^* = 0.603 m_0$ ,  $m_h^* = 0.842 m_0$ ). This pronounced reduction in curvature reflects carrier localization and suppressed mobility commonly associated with vacancy defects. In contrast, substituting oxygen at the Se site removes the vacancy-induced localization by forming stronger and more stable W–O bonds, which restore the delocalized character of the band edges and enhance their curvature. As a result, the electronic structure recovers toward that of the pristine material, yielding even lighter carrier masses ( $m_e^* = 0.393 m_0$ ,  $m_h^* = 0.410 m_0$ ), particularly for holes. These trends demonstrate that Se vacancies degrade transport by weakening orbital overlap, whereas O substitution effectively passivates the defect, reestablishes bonding coherence, and improves carrier dispersibility.

**Table S1: Calculated effective mass of electron ( $m_e^*$ ) and holes ( $m_h^*$ ) of WSe<sub>2</sub> with different conditions**

| System                         | $m_e^*$ | $m_h^*$ |
|--------------------------------|---------|---------|
| Pure WSe <sub>2</sub>          | 0.403m0 | 0.548m0 |
| Se vacant WSe <sub>2</sub>     | 0.603m0 | 0.842m0 |
| O substituted WSe <sub>2</sub> | 0.393m0 | 0.410m0 |
